# Supplementary material for: Infants’ First Solid Foods: Impact on Gut Microbiota Development in Two Intercontinental Cohorts
Source: MDPI journal article supplement (doi:10.3390/nu13082639), 2021-07-30
Supplement: s1 [file s1]

# Infants' First Solid Foods: Impact on Gut Microbiota Development in Two Intercontinental Cohorts.

## Supplementary Materials

**Table S1:** Results of the linear mixed effects models for observed richness and the demographic/nutritional variables of interest for the two cohorts. Multivariable models are adjusted for estimated total energy intake (kcal/d). Diversity scores are further adjusted for age (d), age at introduction and GBS prophylaxis.

|                               | Baby, Food & Mi |               |               |                                 | Lucki-Gut   |            |               |      |
|-------------------------------|-----------------|---------------|---------------|---------------------------------|-------------|------------|---------------|------|
|                               | Univariable     |               | Multivariable |                                 | Univariable |            | Multivariable |      |
|                               | Estimate        | Sig.          | Estimate      | Sig.                            | Estimate    | Sig.       | Estimate      | Sig. |
| Age (d)                       | 0.239           | <b>0.0233</b> | -             | -                               | 0.496       | $P < 0.01$ | -             | -    |
| Sex                           | 5.34            | n.s.          | -             | -                               | 22.279      | $P < 0.05$ | -             | -    |
| Total energy (kcal/d)         | 0.042           | <b>0.0159</b> | -             | -                               | 0.125       | $P < 0.01$ | -             | -    |
| Carbohydrates (kcal/d)        | 0.052           | n.s.          | 0.091         | n.s.                            | 0.110       | $p < 0.1$  | -0.182        | n.s. |
| Fiber (g/d)                   | 0.38            | n.s.          | -0.00039      | n.s.                            | 3.306       | $P < 0.05$ | -0.032        | n.s. |
| Protein (kcal/d)              | 0.059           | n.s.          | 0.052         | n.s.                            | 1.603       | $P < 0.05$ | 0.882         | n.s. |
| Fat (kcal/d)                  | -0.0010         | n.s.          | -0.086        | n.s.                            | 0.274       | $P < 0.05$ | 0.166         | n.s. |
| Food Diversity                | 1.11            | n.s.          | 1.43          | $p < 0.1$                       | 1.049       | n.s.       | 0.082         | n.s. |
| Pre-/Probiotic Diversity      | 1.19            | n.s.          | 1.52          | <b><math>P &lt; 0.05</math></b> | 2.638       | n.s.       | 2.559         | n.s. |
| Food Diversity (/d)           | 0.057           | n.s.          | 0.083         | n.s.                            | 0.641       | $P < 0.05$ | 0.260         | n.s. |
| Pre-/Probiotic Diversity (/d) | 0.66            | n.s.          | 0.87          | n.s.                            | 0.140       | $p < 0.1$  | 0.036         | n.s. |

**Table S2:** Results of the linear mixed effects models for Shannon alpha diversity and the demographic/nutritional variables of interest for the two cohorts. Multivariable models are adjusted for total energy intake (kcal/d), age (d), age introduction and GBS prophylaxis.

|                        | Baby, Food & Mi |                |               |                                 | Lucki-Gut   |      |               |      |
|------------------------|-----------------|----------------|---------------|---------------------------------|-------------|------|---------------|------|
|                        | Univariable     |                | Multivariable |                                 | Univariable |      | Multivariable |      |
|                        | Estimate        | Sig.           | Estimate      | Sig.                            | Estimate    | Sig. | Estimate      | Sig. |
| Age (d)                | 0.0086          | <b>0.0269</b>  | -             | -                               | 0.001       | n.s. | -             | -    |
| Sex                    | 0.0018          | n.s.           | -             | -                               | 0.443       | n.s. | -             | -    |
| Total energy (kcal/d)  | 0.0024          | <b>0.00095</b> | -             | -                               | 0.001       | n.s. | -             | -    |
| Carbohydrates (kcal/d) | 0.0057          | <b>0.0121</b>  | 0.003         | n.s.                            | -0.001      | n.s. | -0.001        | n.s. |
| Fiber (g/d)            | 0.082           | <b>0.0193</b>  | 0.113         | <b><math>P &lt; 0.05</math></b> | 0.026       | n.s. | -0.009        | n.s. |

|                               |         |         |         |         |        |      |        |      |
|-------------------------------|---------|---------|---------|---------|--------|------|--------|------|
| Protein (kcal/d)              | 0.011   | p < 0.1 | -0.012  | n.s.    | 0.015  | n.s. | 0.011  | n.s. |
| Fat (kcal/d)                  | 0.0026  | p < 0.1 | -0.001  | n.s.    | 0.001  | n.s. | 0.001  | n.s. |
| Food Diversity                | 0.014   | n.s.    | 0.025   | n.s.    | -0.006 | n.s. | 0.006  | n.s. |
| Pre-/Probiotic Diversity      | 0.017   | n.s.    | 0.028   | p < 0.1 | 0.031  | n.s. | 0.056  | n.s. |
| Food Diversity (/d)           | -0.0031 | n.s.    | -0.0085 | n.s.    | 0.002  | n.s. | -0.001 | n.s. |
| Pre-/Probiotic Diversity (/d) | -0.018  | n.s.    | 0.00066 | n.s.    | 0.002  | n.s. | 0.002  | n.s. |

**Table S3:** Results of DESeq analysis for all bacterial ASVs significantly associated with fiber intake (g/d), daily food diversity score and daily pre-/probiotic diversity score in the Baby, Food & Mi study.

| Fiber intake (g/d)                        |           |                                 |              |
|-------------------------------------------|-----------|---------------------------------|--------------|
| ASV                                       | Base Mean | log <sub>2</sub> folddifference | adj. p-value |
| <i>Clostridium_sensu_stricto_1</i> ASV 23 | 643.5     | -15.2                           | < 0.00001    |
| <i>Bacteroides</i> ASV 71                 | 188.0     | -12.1                           | < 0.00001    |
| Enterobacteriaceae ASV 119                | 68.4      | -11.7                           | < 0.00001    |
| <i>Bacteroides</i> ASV 16                 | 114.0     | -11.3                           | < 0.00001    |
| <i>Bacteroides</i> ASV 87                 | 43.7      | -9.8                            | < 0.00001    |
| <i>Shimwellia</i> ASV 98                  | 23.5      | -9.6                            | < 0.00001    |
| <i>Bacteroides</i> ASV 14                 | 14.4      | -8.2                            | < 0.00001    |
| Atopobiaceae ASV 121                      | 76.8      | -6.5                            | < 0.00001    |
| <i>Bacteroides</i> ASV 37                 | 2025.4    | 5.5                             | < 0.00001    |
| <i>Escherichia/Shigella</i> ASV 4         | 4666.1    | -4.5                            | < 0.00001    |
| <i>Bifidobacterium</i> ASV 15             | 483.4     | -3.2                            | < 0.00001    |
| Food Diversity Score (/d)                 |           |                                 |              |
| ASV                                       | Base Mean | log <sub>2</sub> folddifference | adj. p-value |
| <i>Veillonella</i> ASV 99                 | 273.0     | -23.6                           | < 0.00001    |
| <i>Veillonella</i> ASV 26                 | 151.7     | -22.8                           | < 0.00001    |
| <i>Citrobacter</i> ASV 92                 | 92.1      | -21.7                           | < 0.00001    |
| <i>Bacteroides</i> ASV 107                | 45.9      | -21.2                           | < 0.00001    |
| <i>Bacteroides</i> ASV 48                 | 33.9      | -20.7                           | < 0.00001    |
| <i>Bacteroides</i> ASV 102                | 24.5      | -20.3                           | < 0.00001    |
| <i>Citrobacter</i> ASV 72                 | 20.9      | -20.1                           | < 0.00001    |
| <i>Veillonella</i> ASV 61                 | 10.1      | -19.0                           | < 0.00001    |
| <i>Parabacteroides</i> ASV 20             | 81.5      | -0.8                            | < 0.00001    |
| <i>Bacteroides</i> ASV 103                | 947.8     | -0.6                            | 0.000302     |
| <i>Bacteroides</i> ASV 163                | 291.3     | -0.5                            | 0.00180      |
| <i>Bacteroides</i> ASV 54                 | 262.5     | -0.5                            | 0.00193      |
| <i>Parabacteroides</i> ASV 151            | 105.7     | -0.5                            | 0.00726      |
| <i>Phascolarctobacterium</i> ASV 79       | 68.7      | -0.5                            | 0.00862      |
| <i>Parabacteroides</i> ASV 12             | 24.2      | -0.4                            | 0.0178       |
| <i>Escherichia/Shigella</i> ASV 4         | 585.5     | -0.4                            | 0.0262       |
| <i>Lactobacillus</i> ASV 6                | 3494.7    | -0.4                            | 0.000204     |
| <i>Klebsiella</i> ASV 32                  | 223.4     | -0.4                            | 0.0178       |
| <i>Bifidobacterium</i> ASV 10             | 4438.7    | -0.4                            | 0.0435       |

|                                            |           |                                 |              |
|--------------------------------------------|-----------|---------------------------------|--------------|
| <i>Bifidobacterium</i> ASV 3               | 17836.2   | 0.3                             | 0.0435       |
| <i>Clostridioides</i> ASV 45               | 58.6      | 0.3                             | 0.0465       |
| <i>Veillonella</i> ASV 147                 | 60.3      | 0.3                             | 0.0465       |
| <i>Shimwellia</i> ASV 98                   | 5.9       | 0.4                             | 0.0435       |
| <i>Enterococcus</i> ASV 64                 | 69.0      | 0.4                             | 0.0435       |
| Enterobacteriaceae ASV 119                 | 6.3       | 0.4                             | 0.0435       |
| <i>Parabacteroides</i> ASV 133             | 84.2      | 0.4                             | 0.0112       |
| Atopobiaceae ASV 121                       | 70.5      | 0.6                             | < 0.00001    |
| <i>Bacteroides</i> ASV 87                  | 40.4      | 0.9                             | < 0.00001    |
| <i>Bacteroides</i> ASV 128                 | 53.8      | 1.1                             | < 0.00001    |
| <i>Bacteroides</i> ASV 37                  | 1176.8    | 1.3                             | < 0.00001    |
| <b>Pre-/Probiotic Diversity Score (/d)</b> |           |                                 |              |
| ASV                                        | Base Mean | log <sub>2</sub> folddifference | adj. p-value |
| <i>Veillonella</i> ASV 26                  | 44.6      | -18.8                           | < 0.00001    |
| <i>Bacteroides</i> ASV 48                  | 33.9      | -15.2                           | < 0.00001    |
| <i>Parabacteroides</i> ASV 12              | 24.2      | -11.7                           | < 0.00001    |
| <i>Citrobacter</i> ASV 92                  | 18.3      | -11.6                           | < 0.00001    |
| <i>Phascolarctobacterium</i> ASV 79        | 15.8      | -11.4                           | < 0.00001    |
| <i>Veillonella</i> ASV 61                  | 10.1      | -11.1                           | < 0.00001    |
| <i>Bacteroides</i> ASV 54                  | 9.3       | -11.1                           | < 0.00001    |
| <i>Bacteroides</i> ASV 107                 | 7.2       | -10.9                           | < 0.00001    |
| <i>Parabacteroides</i> ASV 20              | 81.5      | -2.0                            | 0.0273       |
| <i>Klebsiella</i> ASV 32                   | 223.4     | -1.7                            | 0.0484       |
| <i>Lactobacillus</i> ASV 6                 | 305.8     | -1.4                            | 0.00734      |
| <i>Bifidobacterium</i> ASV 8               | 6225.4    | 1.3                             | 0.0319       |
| <i>Bacteroides</i> ASV 40                  | 336.1     | 1.8                             | 0.0487       |
| <i>Enterococcus</i> ASV 64                 | 69.0      | 1.9                             | 0.0487       |
| <i>Veillonella</i> ASV 96                  | 41.0      | 2.0                             | 0.0299       |
| <i>Escherichia/Shigella</i> ASV 4          | 585.5     | 2.1                             | 0.0213       |
| Atopobiaceae ASV 121                       | 70.5      | 2.2                             | 0.0213       |
| <i>Bifidobacterium</i> ASV 10              | 4409.6    | 5.1                             | < 0.00001    |
| <i>Bacteroides</i> ASV 186                 | 39.7      | 5.4                             | < 0.00001    |
| <i>Bacteroides</i> ASV 37                  | 1176.8    | 5.5                             | < 0.00001    |
| <i>Bacteroides</i> ASV 128                 | 53.8      | 5.6                             | < 0.00001    |
| <i>Parabacteroides</i> ASV 133             | 68.9      | 5.8                             | < 0.00001    |
| <i>Bacteroides</i> ASV 71                  | 122.2     | 6.0                             | < 0.00001    |
| <i>Bacteroides</i> ASV 87                  | 40.4      | 6.2                             | < 0.00001    |

**Table S4:** Results of DESeq analysis for all bacterial ASVs that were significantly associated with fiber intake (g/d) and daily food diversity score in the LucKi-Gut study. No bacterial ASVs were associated with the daily pre-/probiotic diversity score. \*: these ASVs are also among the 10 most abundant ASVs in the LucKi-Gut study.

| Fiber intake (g/d)                  |           |                                  |              |
|-------------------------------------|-----------|----------------------------------|--------------|
| ASV                                 | Base Mean | log <sub>2</sub> foldddifference | adj. p-value |
| <i>Proteus</i> ASV 7                | 66.0      | 12.9                             | < 0.00001    |
| <i>Clostridium neonatale</i> ASV 9* | 532.9     | -2.2                             | 0.00353      |
| <i>Clostridium difficile</i> ASV 4  | 61.4      | -3.6                             | 0.00004      |
| <i>Bifidobacterium</i> ASV 33*      | 730.4     | -3.4                             | 0.0163       |
| <i>Clostridium neonatale</i> ASV 22 | 47.7      | -24.1                            | < 0.00001    |
| Food Diversity Score (/d)           |           |                                  |              |
| ASV                                 | Base Mean | log <sub>2</sub> foldddifference | adj. p-value |
| <i>Bacteroides</i> ASV 170          | 36.2      | -3.1                             | < 0.00001    |
| <i>Bacteroides</i> ASV 183          | 191.1     | -1.2                             | < 0.00001    |
| <i>Sutterella</i> ASV 22            | 28.6      | -0.8                             | 0.00038      |
| <i>Bacteroides</i> ASV 155          | 54.4      | -1.0                             | 0.00090      |
| <i>Escherichia coli</i> ASV 20      | 35.9      | -0.9                             | 0.00364      |

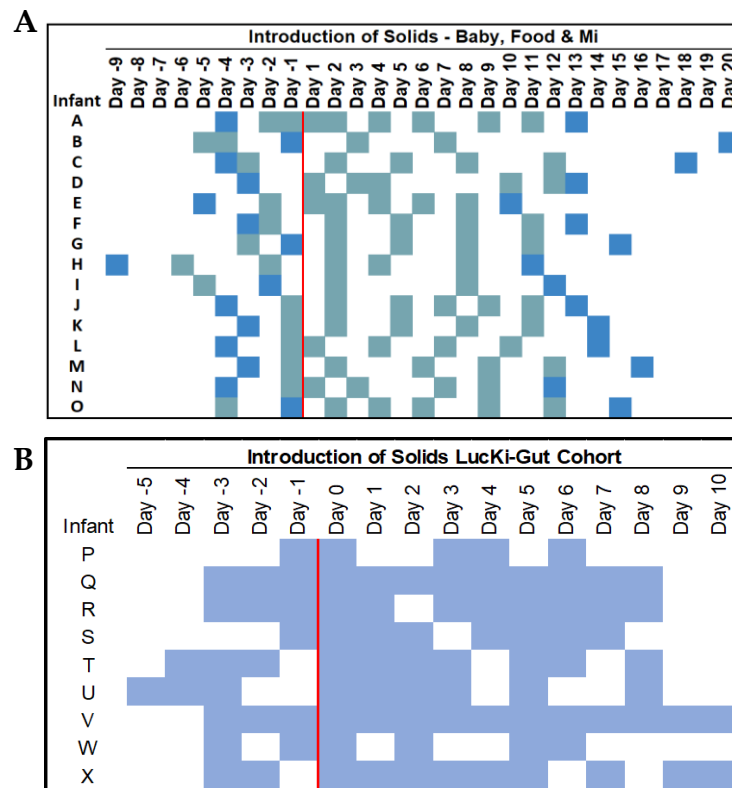

**Figure S1:** Log of sample collection over the study period at the time of solid food introduction. Colored squares indicate a sample was collected on that day. Day 1 is the first day where solid foods were introduced. **A)** Baby, Food & Mi; dark blue squares indicate fresh samples, blue-green squares indicate frozen samples. **B)** LucKi-Gut.

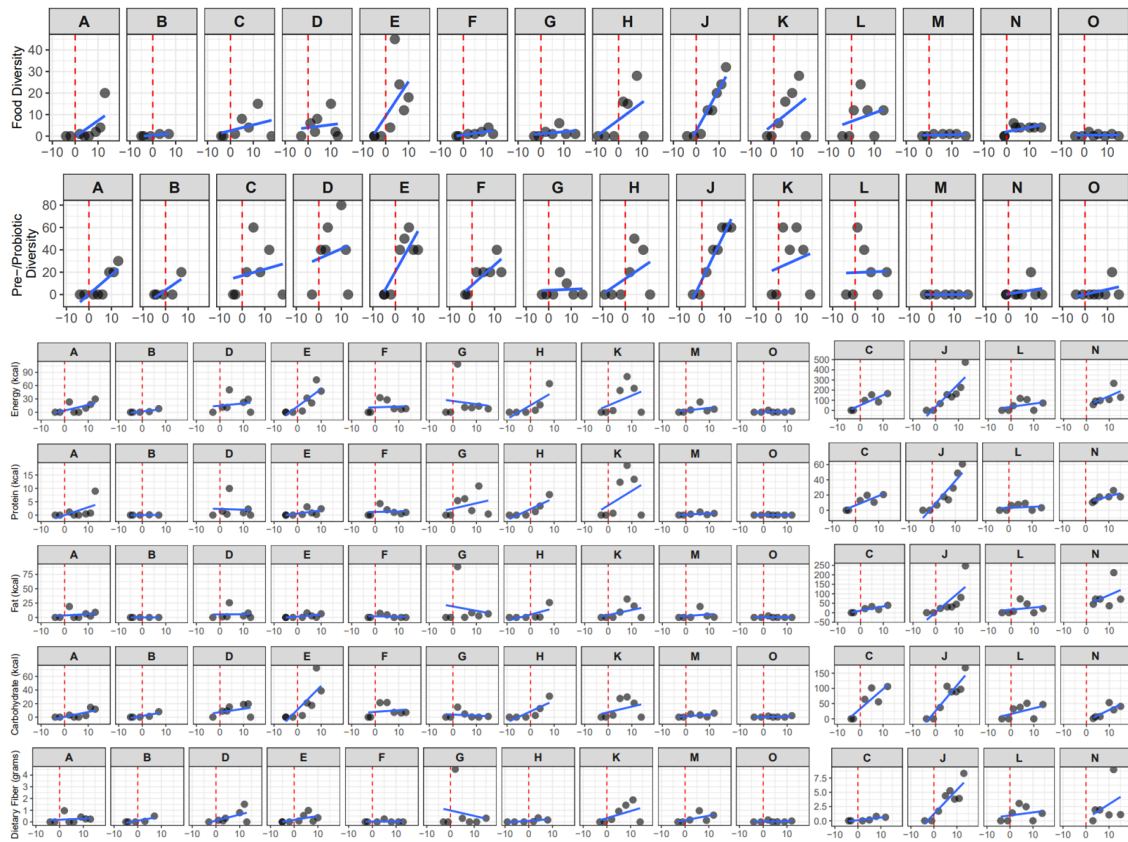

**Figure S2:** Individual infant (A - O) daily dietary intake in the Baby, Food & Mi sub-study for the macronutrients, fiber, and the dietary diversity scores. For the macronutrients and fiber, there was a delineation between infants with high or low caloric intake. High caloric infants: C, J, L, N.

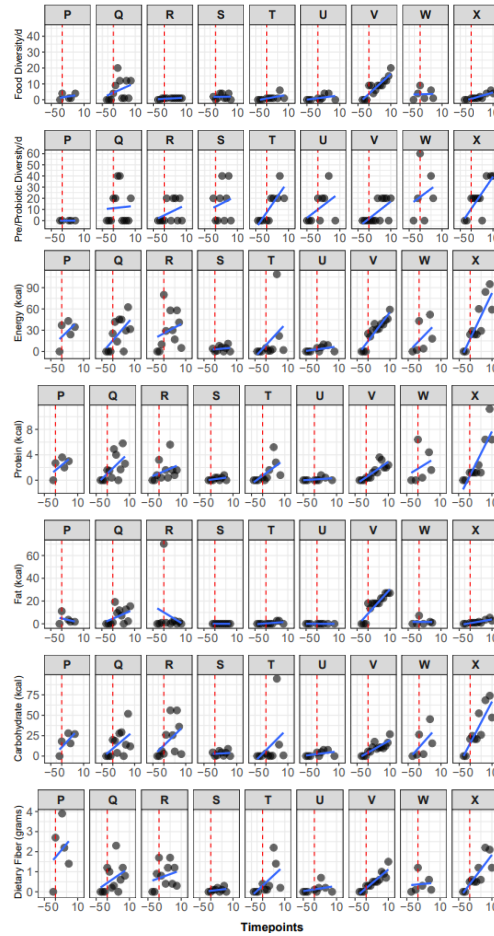

**Figure S3:** Dietary intake over the study period in the LucKi-Gut study on a daily basis for the macronutrients, fiber, and the dietary diversity scores by infant.

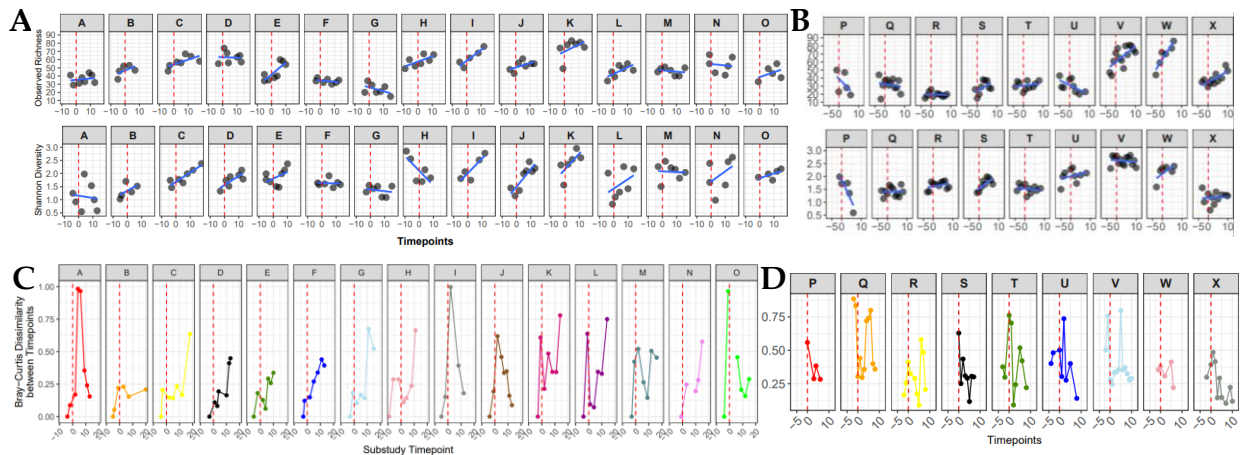

**Figure S4:** Alpha and Beta Diversity Metrics on a day-to-day basis for both cohorts. **A)** Observed richness and Shannon diversity over time for each infant of the Baby, Food & Mi study individually. **B)** Observed richness and Shannon diversity over time for each infant of the LucKi-Gut study individually. **C)** Changes in Bray-Curtis dissimilarity from sample to sample over the study period for infants of the Baby, Food & Mi study. **D)** Changes in Bray-Curtis dissimilarity from sample to sample over the study period for infants of the LucKi-Gut study.

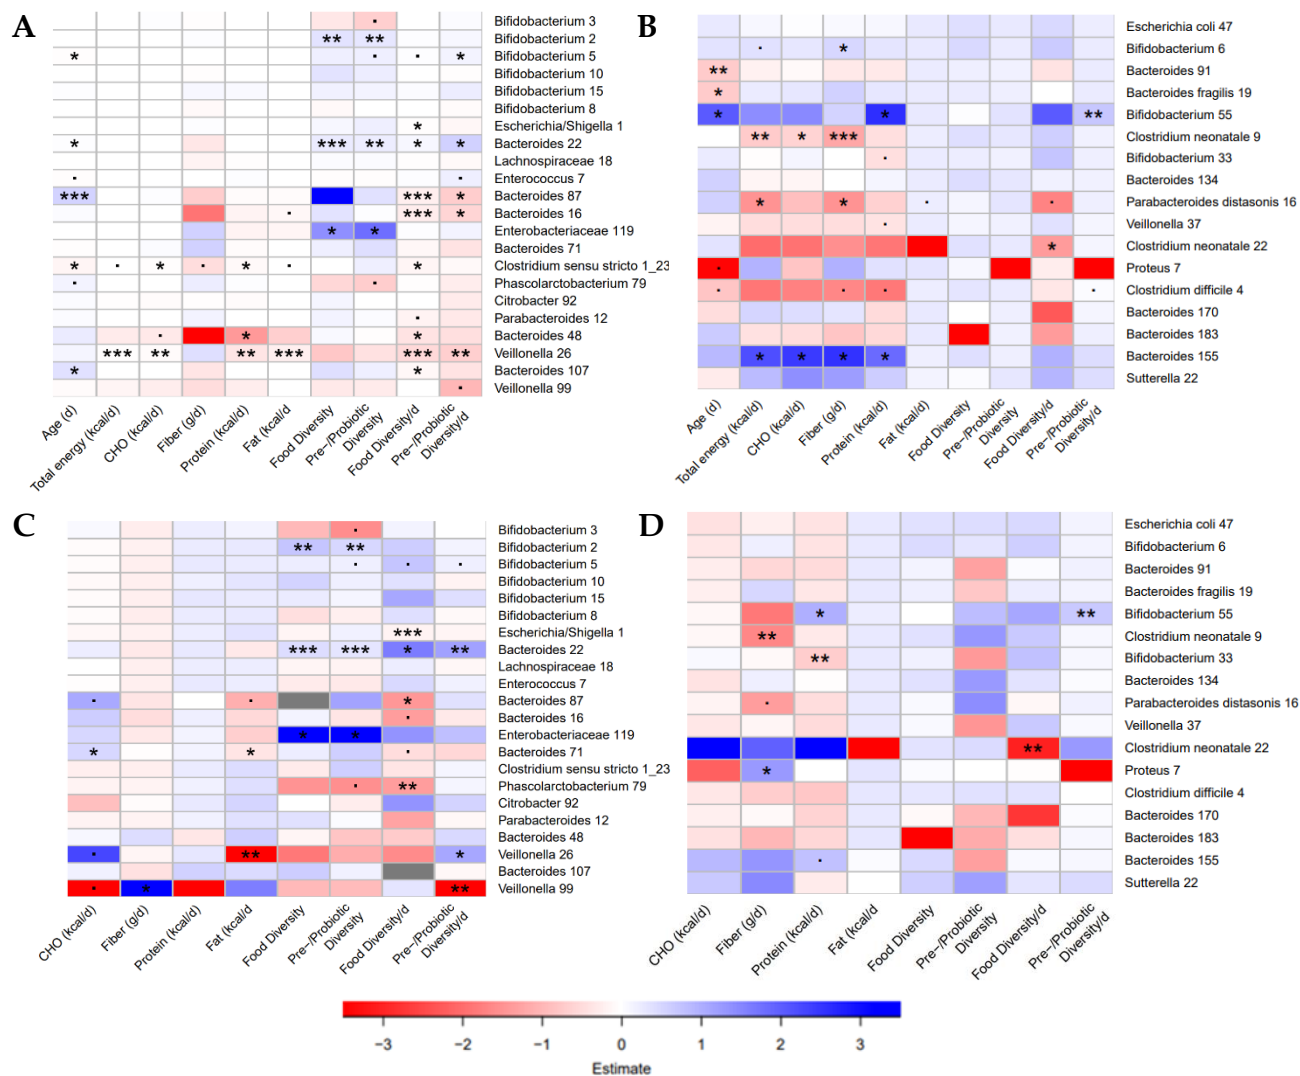

**Figure S5:** Heatmaps of the associations between bacterial ASVs and dietary variables, as analyzed with negative binomial regression models. **A)** Univariate models of the Baby, Food & Mi study. **B)** Univariate models of the Lucki-Gut study. **C)** Multivariate models of the Baby, Food & Mi study corrected for total caloric intake. **D)** Multivariate models of the Lucki-Gut study corrected for total caloric intake. . :  $p < 0.1$ , \* :  $p < 0.05$ , \*\* :  $p < 0.01$ , \*\*\* :  $p < 0.001$ .

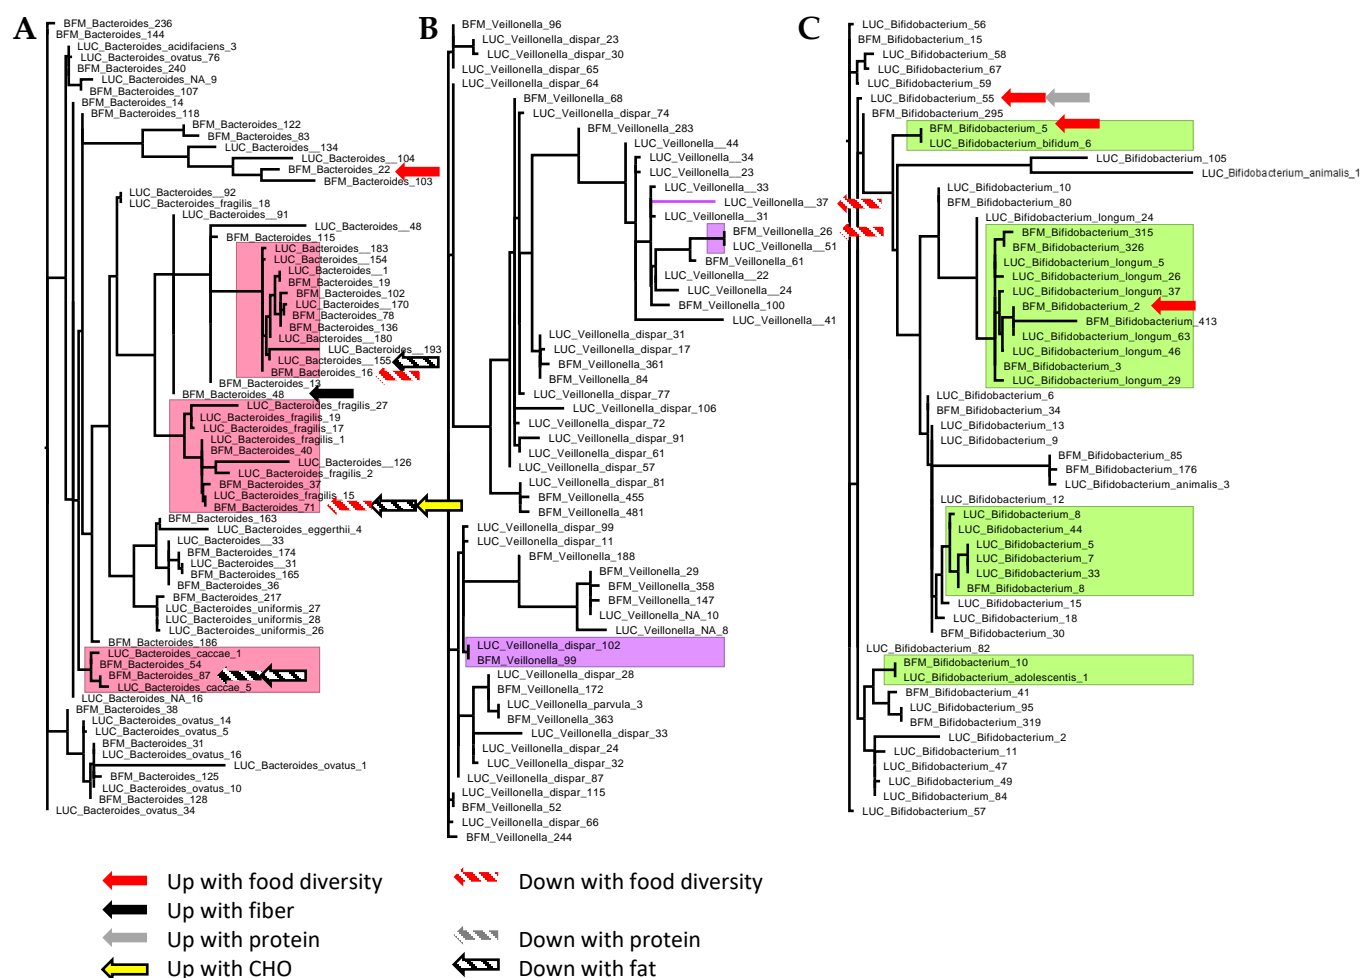

**Figure S6:** Alignment trees for the bacterial genera of interest from the results of the negative binomial regressions for the ASVs from both cohorts. Colored branches indicate a high probability of the ASVs belonging to the same bacterial species. **A:** *Bacteroides*, **B:** *Veillonella*, **C:** *Bifidobacterium*. Arrows indicate an association or trend with nutrition.
